# Supplementary material for: Hippocampal subfield imaging and fractional anisotropy show parallel changes in Alzheimer's disease tau progression using simultaneous tau‐PET/MRI at 3T
Source: PubMed Central journal article supplement — Alzheimers Dement (Amst). 2021 Jul 28;13(1):e12218. doi: 10.1002/dad2.12218 (PMC8319659; doi:10.1002/dad2.12218), 2021-07-28
Supplement: DAD2-13-e12218-s001.pdf [file DAD2-13-e12218-s001.pdf]

**SUPPLEMENTARY TABLE 1: ROI-based DTI statistics summary of all subjects (includes non-amnestic)**

|                              | <i>FA</i>                                     | <i>p</i> | <i>MD [e<sup>-4</sup>]</i>                     | <i>p</i> | <i>ODI</i>                                    | <i>p</i> | <i>FISO</i>                                         | <i>p</i> |
|------------------------------|-----------------------------------------------|----------|------------------------------------------------|----------|-----------------------------------------------|----------|-----------------------------------------------------|----------|
| <b>DG</b>                    | AD/MCI: 0.169±0.0183<br>Control: 0.176±0.0211 | 0.236    | AD/MCI: 8.23±0.473<br>Control: 8.07±0.481      | 0.432    | AD/MCI: 0.517±0.0317<br>Control: 0.513±0.0316 | 0.671    | AD/MCI:<br>0.183±0.0270<br>Control:<br>0.168±0.0175 | 0.139    |
| <b>CA1</b>                   | AD/MCI: 0.156±0.0123<br>Control: 0.156±0.0147 | 0.970    | AD/MCI: 7.89±0.435<br>Control: 7.55±0.256      | 0.044    | AD/MCI: 0.556±0.0195<br>Control: 0.576±0.0236 | 0.051    | AD/MCI:<br>0.168±0.0275<br>Control:<br>0.156±0.0183 | 0.260    |
| <b>SUB</b>                   | AD/MCI: 0.212±0.0233<br>Control: 0.219±0.0338 | 0.612    | AD/MCI:<br>10.33±0.947<br>Control: 9.62±1.310  | 0.134    | AD/MCI: 0.395±0.0410<br>Control: 0.399±0.0475 | 0.860    | AD/MCI:<br>0.250±0.0504<br>Control:<br>0.227±0.0435 | 0.278    |
| <b>ERC/PRC</b>               | AD/MCI: 0.227±0.0498<br>Control: 0.224±0.0271 | 0.865    | AD/MCI: 7.44±0.833<br>Control: 7.19±0.465      | 0.372    | AD/MCI: 0.459±0.0844<br>Control: 0.491±0.0411 | 0.277    | AD/MCI:<br>0.152±0.0380<br>Control:<br>0.136±0.0191 | 0.153    |
| <b>Whole HC</b>              | AD/MCI: 0.195±0.0227<br>Control: 0.195±0.0151 | 0.947    | AD/MCI: 7.97±0.405<br>Control: 7.66±0.435      | 0.079    | AD/MCI: 0.492±0.0376<br>Control: 0.513±0.0220 | 0.111    | AD/MCI:<br>0.170±0.0218<br>Control:<br>0.155±0.0162 | 0.057    |
| <b>PHG</b>                   | AD/MCI: 0.423±0.0286<br>Control: 0.465±0.0276 | 0.003    | AD/MCI: 7.02±0.060<br>Control: 6.98±0.300      | 0.813    | AD/MCI: 0.282±0.0244<br>Control: 0.260±0.0236 | 0.044    | AD/MCI:<br>0.080±0.0226<br>Control:<br>0.074±0.0127 | 0.459    |
| <b>Fornix</b>                | AD/MCI: 0.355±0.1004<br>Control: 0.309±0.0545 | 0.224    | AD/MCI:<br>15.65±2.900<br>Control: 14.46±5.600 | 0.589    | AD/MCI: 0.109±0.0303<br>Control: 0.136±0.0625 | 0.327    | AD/MCI:<br>0.492±0.1334<br>Control:<br>0.464±0.2327 | 0.758    |
| <b>Li + Ji<br/>Threshold</b> |                                               | 0.009    |                                                | 0.010    |                                               | 0.009    |                                                     | 0.010    |

**SUPPLEMENTARY TABLE 2:** Tract-based DTI statistics summary of all subjects (includes non-amnestic).

|                                     | <i>FA</i>                                     | <i>p</i>     | <i>MD [e<sup>-4</sup>]</i>                | <i>p</i> | <i>ODI</i>                                    | <i>p</i>     | <i>FISO</i>                                   | <i>p</i>     |
|-------------------------------------|-----------------------------------------------|--------------|-------------------------------------------|----------|-----------------------------------------------|--------------|-----------------------------------------------|--------------|
| <b>anterior-posterior PHG</b>       | AD/MCI: 0.393±0.0288<br>Control: 0.444±0.0262 | <b>0.001</b> | AD/MCI: 7.14±0.497<br>Control: 6.95±0.292 | 0.383    | AD/MCI: 0.301±0.0129<br>Control: 0.273±0.0202 | <b>0.003</b> | AD/MCI: 0.083±0.0184<br>Control: 0.072±0.0098 | 0.123        |
| <b>CA1 to/from SUB</b>              | AD/MCI: 0.223±0.0217<br>Control: 0.233±0.0291 | 0.460        | AD/MCI: 8.36±0.402<br>Control: 7.98±0.407 | 0.068    | AD/MCI: 0.438±0.0398<br>Control: 0.444±0.0309 | 0.641        | AD/MCI: 0.177±0.0171<br>Control: 0.162±0.0177 | 0.071        |
| <b>DG/CA3,4 to/from CA1</b>         | AD/MCI: 0.180±0.0073<br>Control: 0.197±0.0184 | 0.027        | AD/MCI: 8.99±0.303<br>Control: 8.52±0.528 | 0.050    | AD/MCI: 0.469±0.0158<br>Control: 0.464±0.0210 | 0.715        | AD/MCI: 0.209±0.0125<br>Control: 0.181±0.0216 | <b>0.007</b> |
| <b>ERC/PRC to/from DG/CA3,4/CA1</b> | AD/MCI: 0.297±0.0183<br>Control: 0.324±0.0371 | 0.095        | AD/MCI: 7.49±0.390<br>Control: 7.38±0.618 | 0.703    | AD/MCI: 0.378±0.0336<br>Control: 0.357±0.0283 | 0.196        | AD/MCI: 0.127±0.0219<br>Control: 0.118±0.0300 | 0.490        |
| <b>SUB to/from ERC/PRC</b>          | AD/MCI: 0.325±0.0400<br>Control: 0.351±0.0583 | 0.354        | AD/MCI: 7.77±0.491<br>Control: 7.49±0.711 | 0.411    | AD/MCI: 0.356±0.0373<br>Control: 0.344±0.0417 | 0.608        | AD/MCI: 0.132±0.0155<br>Control: 0.118±0.0270 | 0.241        |
| <b>Li &amp; Ji threshold</b>        |                                               | 0.017        |                                           | 0.017    |                                               | 0.013        |                                               | 0.017        |
